# Supplementary material for: Nighttime migrations and behavioral patterns of Pempheris schwenkii
Source: PeerJ. 2021 Nov 16;9:e12412. doi: 10.7717/peerj.12412 (PMC8603829; doi:10.7717/peerj.12412)
Supplement: Supplemental Information 1 — Mechanical mistakes were rectified. [file peerj-09-12412-s001.xlsx]

## Sheet: June-8
No	Log	Lat	Long	Time	Day	Dis	Ang	Ang2	Speed
13	140-13	26.2633	127.462	19:59:40	2013-06-07	0.001102	115.46	120	0.1
14	140-14	26.2633	127.462	20:00:10	2013-06-07	0.002229	224.23	230	0.3
15	140-15	26.2633	127.462	20:00:40	2013-06-07	0.007721	87.93	90	0.9
16	140-16	26.2634	127.463	20:01:10	2013-06-07	0.014536	68.88	70	1.7
17	140-17	26.2634	127.463	20:01:40	2013-06-07	0.002866	18.89	20	0.3
18	140-18	26.2634	127.463	20:02:10	2013-06-07	0.010067	9.22	10	1.2
19	140-19	26.2634	127.463	20:02:40	2013-06-07	0.005376	143.11	150	0.6
20	140-20	26.2634	127.463	20:03:10	2013-06-07	0.00548	101.63	110	0.7
21	140-21	26.2634	127.463	20:03:40	2013-06-07	0.011755	106.81	110	1.4
22	140-22	26.2634	127.463	20:04:10	2013-06-07	0.010622	332.33	340	1.3
2	135-2			20:13:33	2013-05-31	0.025465
3	135-3	26.2634	127.463	20:14:03	2013-05-31	0.015485	60.62	70	1.9
4	135-4	26.2634	127.463	20:14:33	2013-05-31	0.016223	202.07	210	1.9
5	135-5	26.2634	127.463	20:15:03	2013-05-31	0.003648	356.32	360	0.4
6	135-6	26.2634	127.463	20:15:33	2013-05-31	0.005588	44.8	50	0.7
7	135-7	26.2634	127.463	20:16:03	2013-05-31	0.003561	2.83	10	0.4
8	135-8	26.2634	127.463	20:16:33	2013-05-31	0.005396	39.55	40	0.6
9	135-9	26.2635	127.463	20:17:03	2013-05-31	0.008602	49.55	50	1
10	135-10	26.2635	127.463	20:17:33	2013-05-31	0.000564	13.72	20	0.1
11	135-11	26.2635	127.463	20:18:03	2013-05-31	0.002802	33.71	40	0.3
2	119-2			20:02:20	2013-05-29	0.02721	194.63
3	119-3	26.2634	127.462	20:02:50	2013-05-29	0.012086	338.28	340	1.5
4	119-4	26.2634	127.462	20:03:20	2013-05-29	0.018998	54.15	60	2.3
5	119-5			20:03:50	2013-05-29	0.046434
6	119-6	26.2635	127.463	20:04:20	2013-05-29	0.018328	226.64	230	2.2
7	119-7	26.2635	127.463	20:04:50	2013-05-29	0.001991	204.56	210	0.2
8	119-8	26.2634	127.463	20:05:20	2013-05-29	0.01441	125.63	130	1.7
9	119-9	26.2635	127.463	20:05:50	2013-05-29	0.010682	358.74	360	1.3
10	119-10	26.2635	127.463	20:06:20	2013-05-29	0.002927	358.04	360	0.4
2	119-2	26.2634	127.462	19:54:56	2013-05-27	0.012973	91.76	100	1.6
3	119-3	26.2634	127.462	19:55:26	2013-05-27	0.003663	59.36	60	0.4
4	119-4	26.2634	127.462	19:55:56	2013-05-27	0.005216	77.87	80	0.6
5	119-5	26.2633	127.462	19:56:26	2013-05-27	0.010091	155.53	160	1.2
6	119-6	26.2634	127.462	19:56:56	2013-05-27	0.007006	21.27	30	0.8
7	119-7	26.2634	127.462	19:57:26	2013-05-27	0.016676	60.44	70	2
8	119-8	26.2634	127.462	19:57:56	2013-05-27	0.016159	54.52	60	1.9
9	119-9	26.2634	127.463	19:58:26	2013-05-27	0.012401	52.01	60	1.5
10	119-10	26.2635	127.463	19:58:56	2013-05-27	0.011142	79.39	80	1.3
11	119-11	26.2635	127.463	19:59:26	2013-05-27	0.004356	82.03	90	0.5

## Sheet: May-31
No	Log	Lat	Long	Time	Day	Dis	Ang	Ang2	Speed
2	135-2	26.2634	127.462	20:13:33	2013-05-31	0.025465	89.94	90	3.1
3	135-3	26.2634	127.463	20:14:03	2013-05-31	0.015485	60.62	70	1.9
4	135-4	26.2634	127.463	20:14:33	2013-05-31		202.07	210	1.9
5	135-5	26.2634	127.463	20:15:03	2013-05-31	0.003648	356.32	360	0.4
6	135-6	26.2634	127.463	20:15:33	2013-05-31	0.005588	44.8	50	0.7
7	135-7	26.2634	127.463	20:16:03	2013-05-31	0.003561	2.83	10	0.4
8	135-8	26.2634	127.463	20:16:33	2013-05-31	0.005396	39.55	40	0.6
9	135-9	26.2635	127.463	20:17:03	2013-05-31	0.008602	49.55	50	1
10	135-10	26.2635	127.463	20:17:33	2013-05-31	0.000564	13.72	20	0.1
11	135-11	26.2635	127.463	20:18:03	2013-05-31	0.002802
12	135-12	26.2635	127.463	20:18:33	2013-05-31	0.004712	61.64	70	0.6
13	135-13	26.2635	127.463	20:19:03	2013-05-31	0.007558	42.09	50	0.9
14	135-14	26.2635	127.463	20:19:33	2013-05-31	0.000603	312.68	320	0.1
15	135-15	26.2635	127.463	20:20:03	2013-05-31	0.001276	23.55	30	0.2
16	135-16	26.2635	127.463	20:20:33	2013-05-31	0.008257	350.91	360	1
17	135-17	26.2635	127.463	20:21:03	2013-05-31	0.000948	42.74	50	0.1
18	135-18	26.2635	127.463	20:21:33	2013-05-31	0.002997	348.25	350	0.4
19	135-19	26.2635	127.463	20:22:03	2013-05-31
20	135-20	26.2635	127.463	20:22:33	2013-05-31	0.002883	32.44	40	0.3
21	135-21	26.2635	127.463	20:23:03	2013-05-31
22	135-22	26.2635	127.463	20:23:33	2013-05-31	0.000515	324.24	330	0.1
23	135-23	26.2635	127.463	20:24:03	2013-05-31	1.2e-05	221.99	230	0
24	135-24	26.2635	127.463	20:24:33	2013-05-31	0.000835	247.09	250	0.1
25	135-25	26.2635	127.463	20:25:03	2013-05-31	0.000281	306.52	310	0
26	135-26	26.2635	127.463	20:25:33	2013-05-31	0.002726	91.17	100	0.3
27	135-27	26.2636	127.463	20:26:03	2013-05-31	0.006219	287.11	290	0.7
28	135-28	26.2635	127.463	20:26:33	2013-05-31	0.001984	137.29	140	0.2
29	135-29	26.2635	127.463	20:27:03	2013-05-31
30	135-30	26.2635	127.463	20:27:33	2013-05-31	0.002019	121.93	130	0.2
31	135-31	26.2635	127.463	20:28:03	2013-05-31	0.002443	114	120	0.3
32	135-32	26.2635	127.463	20:28:33	2013-05-31	0.000605	144.5	150	0.1
33	135-33	26.2635	127.463	20:29:03	2013-05-31	9.9e-05	160.2	170	0
34	135-34	26.2635	127.463	20:29:33	2013-05-31	0.001506	135.17	140	0.2
35	135-35	26.2635	127.463	20:30:03	2013-05-31	0.000194	295.46	300	0
36	135-36	26.2635	127.463	20:30:33	2013-05-31	0.001554	319.38	320	0.2
37	135-37	26.2635	127.463	20:31:03	2013-05-31	0.00404	147.03	150	0.5
38	135-38	26.2635	127.463	20:31:33	2013-05-31	0.003811	352.69	360	0.5
39	135-39	26.2636	127.463	20:32:03	2013-05-31	0.004253	9.28	10	0.5
40	135-40	26.2636	127.463	20:32:33	2013-05-31	0.001059	300.59	310	0.1
41	135-41	26.2636	127.463	20:33:03	2013-05-31	0.003623	31.12	40	0.4
42	135-42	26.2636	127.463	20:33:33	2013-05-31	0.002543	80.54	90	0.3
43	135-43	26.2636	127.463	20:34:03	2013-05-31	0.006604	64.33	70	0.8
44	135-44	26.2636	127.463	20:34:33	2013-05-31	0.001296	217.32	220	0.2
45	135-45	26.2636	127.463	20:35:03	2013-05-31	0.001669	185.17	190	0.2
46	135-46	26.2636	127.463	20:35:33	2013-05-31	0.001172	127.62	130	0.1
47	135-47	26.2636	127.463	20:36:03	2013-05-31	0.001628	172.92	180	0.2
48	135-48	26.2636	127.463	20:36:33	2013-05-31	0.002818	207.57	210	0.3
49	135-49	26.2635	127.463	20:37:03	2013-05-31	0.008899	106.43	110	1.1
50	135-50	26.2635	127.463	20:37:33	2013-05-31	0.004515	292.75	300	0.5
51	135-51	26.2636	127.463	20:38:03	2013-05-31	0.014142	327.34	330	1.7
52	135-52	26.2636	127.463	20:38:33	2013-05-31	0.009477	201.26	210	1.1
53	135-53	26.2636	127.463	20:39:03	2013-05-31	0.003711	243.71	250	0.4
54	135-54	26.2636	127.463	20:39:33	2013-05-31	0.000652	239.17	240	0.1
55	135-55	26.2636	127.463	20:40:03	2013-05-31	0.001366	306.73	310	0.2
56	135-56	26.2636	127.463	20:40:33	2013-05-31	0.001422	33.96	40	0.2
57	135-57	26.2636	127.463	20:41:03	2013-05-31	0.001708	34.26	40	0.2
58	135-58	26.2636	127.463	20:41:33	2013-05-31	0.000846	25.78	30	0.1
59	135-59	26.2636	127.463	20:42:03	2013-05-31	0.003276	12.08	20	0.4
60	135-60	26.2636	127.463	20:42:33	2013-05-31	0.002244	16.23	20	0.3
61	135-61	26.2636	127.463	20:43:03	2013-05-31	0.010197	31.82	40	1.2
62	135-62	26.2636	127.463	20:43:33	2013-05-31	0.004311	32.62	40	0.5
63	135-63	26.2636	127.463	20:44:03	2013-05-31	0.002292	6.91	10	0.3
64	135-64	26.2636	127.463	20:44:33	2013-05-31	0.002479	47.03	50	0.3
65	135-65	26.2636	127.463	20:45:03	2013-05-31	0.004079	340.48	350	0.5
66	135-66	26.2637	127.463	20:45:33	2013-05-31	0.008395	53	60	1
67	135-67	26.2637	127.463	20:46:03	2013-05-31	0.006616	39.84	40	0.8
68	135-68	26.2637	127.463	20:46:33	2013-05-31	0.006186	29.46	30	0.7
69	135-69	26.2637	127.463	20:47:03	2013-05-31	0.002328	355.88	360	0.3
70	135-70	26.2637	127.463	20:47:33	2013-05-31	0.000104	74.48	80	0
71	135-71	26.2637	127.463	20:48:03	2013-05-31	0.006614	90.97	100	0.8
72	135-72	26.2637	127.463	20:48:33	2013-05-31	0.002838	28.32	30	0.3
73	135-73	26.2637	127.463	20:49:03	2013-05-31	0.001138	45.44	50	0.1
74	135-74	26.2637	127.463	20:49:33	2013-05-31	0.001296	332.73	340	0.2
75	135-75	26.2637	127.463	20:50:03	2013-05-31	0.001017	56.14	60	0.1
76	135-76	26.2637	127.463	20:50:33	2013-05-31	0.001794	265.84	270	0.2
77	135-77	26.2637	127.463	20:51:03	2013-05-31	0.001517	114.6	120	0.2
78	135-78	26.2637	127.463	20:51:33	2013-05-31	0.000812	78.11	80	0.1
79	135-79	26.2637	127.463	20:52:03	2013-05-31	0.00106	36.27	40	0.1
80	135-80	26.2638	127.463	20:52:33	2013-05-31	0.011473	333.75	340	1.4
81	135-81	26.2638	127.463	20:53:03	2013-05-31	0.003828	115.28	120	0.5
82	135-82	26.2638	127.463	20:53:33	2013-05-31	0.001203	101.58	110	0.1
83	135-83	26.2637	127.463	20:54:03	2013-05-31	0.003568	250.38	260	0.4
84	135-84	26.2637	127.463	20:54:33	2013-05-31	0.002528	26.4437	30	0.3
85	135-85	26.2637	127.463	20:55:03	2013-05-31	0.008047	106.91	110	1
86	135-86	26.2637	127.463	20:55:33	2013-05-31	0.003179	257.34	260	0.4
87	135-87	26.2637	127.463	20:56:03	2013-05-31	0.000568	168.96	170	0.1
88	135-88	26.2637	127.463	20:56:33	2013-05-31	0.000205	309.3	310	0
89	135-89	26.2637	127.463	20:57:03	2013-05-31	0.000297	181.61	190	0
90	135-90	26.2637	127.463	20:57:33	2013-05-31	0.000286	144.24	150	0
91	135-91	26.2637	127.463	20:58:03	2013-05-31	0.000455	82.96	90	0.1
92	135-92	26.2637	127.463	20:58:33	2013-05-31	0.001143	2.51	10	0.1
93	135-93	26.2637	127.463	20:59:03	2013-05-31	0.003172	114.94	120	0.4
94	135-94	26.2637	127.463	20:59:33	2013-05-31	0.001283	152.02	160	0.2
95	135-95	26.2637	127.463	21:00:03	2013-05-31	0.00059	300.23	310	0.1
96	135-96	26.2637	127.463	21:00:33	2013-05-31	0.000679	266.08	270	0.1
97	135-97	26.2637	127.463	21:01:03	2013-05-31	0.00287	137.26	140	0.3
98	135-98	26.2637	127.463	21:01:33	2013-05-31	0.000479	257.69	260	0.1
99	135-99	26.2637	127.463	21:02:03	2013-05-31	0.001698	45.56	50	0.2
100	135-100	26.2637	127.463	21:02:33	2013-05-31	0.000926	276.91	280	0.1
101	135-101	26.2637	127.463	21:03:03	2013-05-31	0.001322	284.65	290	0.2
102	135-102	26.2637	127.463	21:03:33	2013-05-31	0.000522	313.91	320	0.1
103	135-103	26.2637	127.463	21:04:03	2013-05-31	0.003268	284.15	290	0.4
104	135-104	26.2637	127.463	21:04:33	2013-05-31	0.001517	230	230	0.2
105	135-105	26.2637	127.463	21:05:03	2013-05-31	0.006336	328.23	330	0.8
106	135-106	26.2637	127.463	21:05:33	2013-05-31	0.005558	233.73	240	0.7

## Sheet: May-29
No	Log	Lat	Long	Time	Day	Dis	Ang	Ang2	Speed
2	119-2	26.2634	127.462	20:02:20	2013-05-29	0.02721	194.63	200	3.3
3	119-3	26.2634	127.462	20:02:50	2013-05-29	0.012086	338.28	340	1.5
4	119-4	26.2634	127.462	20:03:20	2013-05-29	0.018998	54.15	60	2.3
6	119-6	26.2635	127.463	20:04:20	2013-05-29	0.018328	226.64	230	2.2
7	119-7	26.2635	127.463	20:04:50	2013-05-29	0.001991	204.56	210	0.2
8	119-8	26.2634	127.463	20:05:20	2013-05-29	0.01441	125.63	130	1.7
9	119-9	26.2635	127.463	20:05:50	2013-05-29	0.010682	358.74	360	1.3
10	119-10	26.2635	127.463	20:06:20	2013-05-29	0.002927	358.04	360	0.4
11	119-11	26.2635	127.463	20:06:50	2013-05-29	0.005976	129.58	130	0.7
12	119-12	26.2635	127.463	20:07:20	2013-05-29	0.002144	318.17	320	0.3
13	119-13	26.2635	127.463	20:07:50	2013-05-29	0.001045	194.36	200	0.1
14	119-14	26.2635	127.463	20:08:20	2013-05-29	0.001265	334.56	340	0.2
15	119-15	26.2635	127.463	20:08:50	2013-05-29	0.001608	330.05	340	0.2
16	119-16	26.2635	127.463	20:09:20	2013-05-29	0.000461	281.62	290	0.1
17	119-17	26.2635	127.463	20:09:50	2013-05-29	0.003297	333.98	340	0.4
18	119-18	26.2635	127.463	20:10:20	2013-05-29	0.001795	307.63	310	0.2
19	119-19	26.2635	127.463	20:10:50	2013-05-29	0.000881	243.06	250	0.1
20	119-20	26.2635	127.463	20:11:20	2013-05-29	0.00201	351.39	360	0.2
21	119-21	26.2635	127.463	20:11:50	2013-05-29	0.001096	16.84	20	0.1
22	119-22	26.2635	127.463	20:12:20	2013-05-29	0.000795	92.68	100	0.1
23	119-23	26.2635	127.463	20:12:50	2013-05-29	0.002353	5.91	10	0.3
24	119-24	26.2635	127.463	20:13:20	2013-05-29	0.000139	302.41	310	0
25	119-25	26.2635	127.463	20:13:50	2013-05-29	0.00245	248.66	250	0.3
26	119-26	26.2635	127.463	20:14:20	2013-05-29	0.002566	190.13	200	0.3
27	119-27	26.2635	127.463	20:14:50	2013-05-29	0.000889	34.36	40	0.1
28	119-28	26.2635	127.463	20:15:20	2013-05-29	0.000227	277.04	280	0
29	119-29	26.2635	127.463	20:15:50	2013-05-29	0.000401	90	90	0
30	119-30	26.2635	127.463	20:16:20	2013-05-29
31	119-31	26.2635	127.463	20:16:50	2013-05-29	0.008867	300.6	310	1.1
32	119-32	26.2635	127.463	20:17:20	2013-05-29	0.002572	146.9	150	0.3
33	119-33	26.2635	127.463	20:17:50	2013-05-29
34	119-34	26.2635	127.463	20:18:20	2013-05-29	0.005382	147.17	150	0.6
35	119-35	26.2635	127.463	20:18:50	2013-05-29	0.005772	72.1	80	0.7
36	119-36	26.2635	127.463	20:19:20	2013-05-29	0.002713	1.94	10	0.3
37	119-37	26.2635	127.463	20:19:50	2013-05-29	0.005762	117.56	120	0.7
38	119-38	26.2635	127.463	20:20:20	2013-05-29	0.002929	236.74	240	0.4
39	119-39	26.2635	127.463	20:20:50	2013-05-29
40	119-40	26.2635	127.463	20:21:20	2013-05-29	0.003161	191.13	200	0.4
41	119-41	26.2635	127.463	20:21:50	2013-05-29	0.000204	259.51	260	0
42	119-42	26.2635	127.463	20:22:20	2013-05-29	0.00114	55.23	60	0.1
43	119-43	26.2635	127.463	20:22:50	2013-05-29	0.000562	352.31	360	0.1
44	119-44	26.2635	127.463	20:23:20	2013-05-29	0.003378	5.54	10	0.4
45	119-45	26.2635	127.463	20:23:50	2013-05-29	0.005436	18.84	20	0.7
46	119-46	26.2635	127.463	20:24:20	2013-05-29	0.002138	72.56	80	0.3
47	119-47	26.2635	127.463	20:24:50	2013-05-29	0.001406	87.73	90	0.2
48	119-48	26.2635	127.463	20:25:20	2013-05-29	0.005035	75.47	80	0.6
49	119-49	26.2635	127.463	20:25:50	2013-05-29	0.010478	56.24	60	1.3
50	119-50	26.2636	127.463	20:26:20	2013-05-29	0.022847	47.69	50	2.7
51	119-51	26.2636	127.463	20:26:50	2013-05-29	0.010788	80.84	90	1.3
52	119-52	26.2636	127.463	20:27:20	2013-05-29	0.006816	8.96	10	0.8
53	119-53	26.2636	127.463	20:27:50	2013-05-29	0.009804	13.86	20	1.2
54	119-54	26.2636	127.463	20:28:20	2013-05-29	0.001659	7.82	10	0.2
55	119-55	26.2637	127.463	20:28:50	2013-05-29	0.004	342.61	350	0.5
56	119-56	26.2637	127.463	20:29:20	2013-05-29	0.007114	327.36	330	0.9
57	119-57	26.2637	127.463	20:29:50	2013-05-29	0.010337	321.66	330	1.2
58	119-58	26.2637	127.463	20:30:20	2013-05-29	0.007741	309.93	310	0.9
59	119-59	26.2637	127.463	20:30:50	2013-05-29	0.002647	275.84	270	0.3
60	119-60	26.2637	127.463	20:31:20	2013-05-29	0.001386	227.91	230	0.2
61	119-61	26.2637	127.463	20:31:50	2013-05-29
62	119-62	26.2637	127.463	20:32:20	2013-05-29	0.001134	253.35	260	0.1
63	119-63	26.2637	127.463	20:32:50	2013-05-29	0.001807	161.94	170	0.2
64	119-64	26.2637	127.463	20:33:20	2013-05-29	0.002761	304.87	310	0.3
65	119-65	26.2637	127.463	20:33:50	2013-05-29	0.000818	233.83	240	0.1
66	119-66	26.2637	127.463	20:34:20	2013-05-29	0.000263	67.15	70	0
67	119-67	26.2637	127.463	20:34:50	2013-05-29	0.000204	204.23	210	0
68	119-68	26.2637	127.463	20:35:20	2013-05-29	0.001316	332.78	340	0.2
69	119-69	26.2637	127.463	20:35:50	2013-05-29	0.001519	63.1	70	0.2
70	119-70	26.2637	127.463	20:36:20	2013-05-29	0.000591	66.87	70	0.1
71	119-71	26.2637	127.463	20:36:50	2013-05-29	0.003317	95.46	100	0.4
72	119-72	26.2637	127.463	20:37:20	2013-05-29	0.000644	87.52	90	0.1
73	119-73	26.2637	127.463	20:37:50	2013-05-29	0.011728	87.96	90	1.4
74	119-74	26.2637	127.463	20:38:20	2013-05-29	0.001606	88.67	90	0.2
75	119-75	26.2637	127.463	20:38:50	2013-05-29	0.002471	93.45	100	0.3
76	119-76	26.2637	127.463	20:39:20	2013-05-29
77	119-77	26.2637	127.463	20:39:50	2013-05-29	0.005655	76.22	80	0.7
78	119-78	26.2638	127.463	20:40:20	2013-05-29	0.015691	60.77	70	1.9
79	119-79	26.2638	127.463	20:40:50	2013-05-29	0.008882	8.06	10	1.1
80	119-80	26.2638	127.463	20:41:20	2013-05-29	0.006108	340.49	350	0.7
81	119-81	26.2638	127.463	20:41:50	2013-05-29	0.002034	267.12	270	0.2
82	119-82	26.2638	127.463	20:42:20	2013-05-29	0.00284	290.08	300	0.3
83	119-83	26.2638	127.463	20:42:50	2013-05-29	0.003438	241.09	250	0.4
84	119-84	26.2638	127.463	20:43:20	2013-05-29	0.00687	286.98	290	0.8
85	119-85	26.2638	127.463	20:43:50	2013-05-29
86	119-86	26.2638	127.463	20:44:20	2013-05-29	0.002242	240.74	250	0.3
87	119-87	26.2638	127.463	20:44:50	2013-05-29	0.000421	299.05	300	0.1
88	119-88	26.2638	127.463	20:45:20	2013-05-29	0.011927	300.04	310	1.4
89	119-89	26.2638	127.463	20:45:50	2013-05-29	0.012146	256.38	260	1.5
90	119-90	26.2638	127.463	20:46:20	2013-05-29	0.012447	261.63	270	1.5
91	119-91	26.2638	127.463	20:46:50	2013-05-29	0.004583	330.85	340	0.5
92	119-92	26.2638	127.463	20:47:20	2013-05-29	0.007262	288.03	290	0.9
93	119-93	26.2638	127.463	20:47:50	2013-05-29	0.00782	255.84	260	0.9
94	119-94	26.2638	127.463	20:48:20	2013-05-29	0.000999	210.15	220	0.1
95	119-95	26.2638	127.463	20:48:50	2013-05-29	0.002759	198.92	200	0.3
96	119-96	26.2638	127.463	20:49:20	2013-05-29	0.000732	113.96	120	0.1
97	119-97	26.2638	127.463	20:49:50	2013-05-29	0.005141	85.44	90	0.6
98	119-98	26.2638	127.463	20:50:20	2013-05-29	0.002442	72.75	80	0.3
99	119-99	26.2638	127.463	20:50:50	2013-05-29	0.004513	128.58	130	0.5
100	119-100	26.2638	127.463	20:51:20	2013-05-29	0.004967	119.33	120	0.6
101	119-101	26.2638	127.463	20:51:50	2013-05-29	0.005659	84.73	90	0.7
102	119-102	26.2638	127.463	20:52:20	2013-05-29	0.001651	125.4	130	0.2
103	119-103	26.2638	127.463	20:52:50	2013-05-29	0.001245	140.87	150	0.1
104	119-104	26.2638	127.463	20:53:20	2013-05-29	0.004719	115.15	120	0.6
105	119-105	26.2638	127.463	20:53:50	2013-05-29	0.002251	121.32	130	0.3
106	119-106	26.2638	127.463	20:54:20	2013-05-29	0.001179	89.55	90	0.1
107	119-107	26.2638	127.463	20:54:50	2013-05-29	0.003744	102.03	110	0.4
108	119-108	26.2638	127.463	20:55:20	2013-05-29	0.002106	102.48	110	0.3
109	119-109	26.2638	127.463	20:55:50	2013-05-29	0.00296	91.08	100	0.4
110	119-110	26.2638	127.463	20:56:20	2013-05-29	0.012686	104.07	110	1.5
111	119-111	26.2638	127.463	20:56:50	2013-05-29	0.00401	144.14	150	0.5
112	119-112	26.2637	127.463	20:57:20	2013-05-29	0.006736	172.44	180	0.8
113	119-113	26.2637	127.463	20:57:50	2013-05-29	0.003252	160.47	170	0.4
114	119-114	26.2637	127.463	20:58:20	2013-05-29	0.001662	161.82	170	0.2
115	119-115	26.2637	127.463	20:58:50	2013-05-29	0.006342	138.57	140	0.8
116	119-116	26.2637	127.463	20:59:20	2013-05-29	0.008449	189.22	190	1
117	119-117	26.2636	127.463	20:59:50	2013-05-29	0.012689	183.36	190	1.5
118	119-118	26.2636	127.463	21:00:20	2013-05-29	0.001456	218.32	220	0.2
119	119-119	26.2636	127.463	21:00:50	2013-05-29	0.00225	182.56	190	0.3
120	119-120	26.2636	127.463	21:01:20	2013-05-29	0.005173	184.91	190	0.6
121	119-121	26.2636	127.463	21:01:50	2013-05-29	0.005176	175.93	180	0.6
122	119-122	26.2636	127.463	21:02:20	2013-05-29	0.005991	189.64	190	0.7
123	119-123	26.2635	127.463	21:02:50	2013-05-29	0.006611	186.68	190	0.8
124	119-124	26.2635	127.463	21:03:20	2013-05-29	0.009428	188.52	190	1.1
125	119-125	26.2635	127.463	21:03:50	2013-05-29	0.002347	184.49	190	0.3
126	119-126	26.2635	127.463	21:04:20	2013-05-29	0.006437	183.35	190	0.8
127	119-127	26.2635	127.463	21:04:50	2013-05-29	0.009903	198.2	200	1.2
128	119-128	26.2634	127.463	21:05:20	2013-05-29	0.011827	203.49	210	1.4
129	119-129	26.2634	127.463	21:05:50	2013-05-29	0.00859	216.14	220	1
130	119-130	26.2634	127.463	21:06:20	2013-05-29	0.004489	206.91	210	0.5
131	119-131	26.2634	127.463	21:06:50	2013-05-29	6.5e-05	295.46	300	0
132	119-132	26.2633	127.463	21:07:20	2013-05-29	0.014102	169.89	170	1.7
133	119-133	26.2633	127.463	21:07:50	2013-05-29	0.002804	153.82	160	0.3
134	119-134	26.2633	127.463	21:08:20	2013-05-29	0.002196	138.82	140	0.3
135	119-135	26.2634	127.463	21:08:50	2013-05-29	0.00823	358.6	360	1
136	119-136	26.2633	127.463	21:09:20	2013-05-29	0.010423	155.96	160	1.3
137	119-137	26.2633	127.463	21:09:50	2013-05-29	0.000584	242.54	250	0.1
138	119-138	26.2633	127.463	21:10:20	2013-05-29	0.007714	138.28	140	0.9
139	119-139	26.2633	127.463	21:10:50	2013-05-29	0.008942	134.34	140	1.1
140	119-140	26.2633	127.463	21:11:20	2013-05-29	0.004667	145.27	150	0.6
141	119-141	26.2633	127.463	21:11:50	2013-05-29	0.007623	134.08	140	0.9
142	119-142	26.2633	127.463	21:12:20	2013-05-29	0.002409	115.09	120	0.3
143	119-143	26.2633	127.463	21:12:50	2013-05-29	0.000256	250.98	260	0

## Sheet: May-27
No	Log	Lat	Long	Time	Day	Dis	Ang	Ang2	Speed
6	119-6	26.2634	127.462	19:56:56	2013-05-27	0.007006	21.27	30	0.8
7	119-7	26.2634	127.462	19:57:26	2013-05-27	0.016676	60.44	70	2
8	119-8	26.2634	127.462	19:57:56	2013-05-27	0.016159	54.52	60	1.9
9	119-9	26.2634	127.463	19:58:26	2013-05-27	0.012401	52.01	60	1.5
10	119-10	26.2635	127.463	19:58:56	2013-05-27	0.011142	79.39	80	1.3
11	119-11	26.2635	127.463	19:59:26	2013-05-27	0.004356	82.03	90	0.5
12	119-12	26.2635	127.463	19:59:56	2013-05-27	0.000833	83.6	90	0.1
13	119-13	26.2635	127.463	20:00:26	2013-05-27	0.002179	55.18	60	0.3
14	119-14	26.2635	127.463	20:00:56	2013-05-27	0.001844	31.12	40	0.2
15	119-15	26.2635	127.463	20:01:26	2013-05-27	0.001692	36.73	40	0.2
16	119-16	26.2635	127.463	20:01:56	2013-05-27	0.002433	67.56	70	0.3
17	119-17	26.2635	127.463	20:02:26	2013-05-27	0.001235	64.15	70	0.1
18	119-18	26.2635	127.463	20:02:56	2013-05-27	0.004632	38.38	40	0.6
19	119-19	26.2635	127.463	20:03:26	2013-05-27	0.001608	24.91	30	0.2
20	119-20	26.2635	127.463	20:03:56	2013-05-27	0.000818	32.81	40	0.1
21	119-21	26.2635	127.463	20:04:26	2013-05-27		0		0
22	119-22	26.2635	127.463	20:04:56	2013-05-27	0.00171	17.06	20	0.2
23	119-23	26.2635	127.463	20:05:26	2013-05-27	0.001164	24.61	30	0.1
24	119-24	26.2635	127.463	20:05:56	2013-05-27	0.002236	353.13	360	0.3
25	119-25	26.2635	127.463	20:06:26	2013-05-27	0.000849	354.35	360	0.1
26	119-26	26.2635	127.463	20:06:56	2013-05-27	0.0027	4.08	10	0.3
27	119-27	26.2635	127.463	20:07:26	2013-05-27	0.000836	0.57	10	0.1
28	119-28	26.2635	127.463	20:07:56	2013-05-27	0.001263	358.48	360	0.2
29	119-29	26.2635	127.463	20:08:26	2013-05-27	0.001088	357.36	360	0.1
30	119-30	26.2636	127.463	20:08:56	2013-05-27	0.010028	319.82	320	1.2
31	119-31	26.2636	127.463	20:09:26	2013-05-27		0		0
32	119-32	26.2636	127.463	20:09:56	2013-05-27	0.000814	312.31	320	0.1
33	119-33	26.2636	127.463	20:10:26	2013-05-27	0.000228	333.85	340	0
34	119-34	26.2636	127.463	20:10:56	2013-05-27		0		0
35	119-35	26.2636	127.463	20:11:26	2013-05-27	0.0014	292.22	300	0.2
36	119-36	26.2636	127.463	20:11:56	2013-05-27	0.000425	300.14	310	0.1
37	119-37	26.2636	127.463	20:12:26	2013-05-27	0.000728	304.17	310	0.1
38	119-38	26.2636	127.463	20:12:56	2013-05-27	0.001428	307.22	310	0.2
39	119-39	26.2636	127.463	20:13:26	2013-05-27	0.000557	328.29	330	0.1
40	119-40	26.2636	127.463	20:13:56	2013-05-27		0		0
41	119-41	26.2636	127.463	20:14:26	2013-05-27	0.000414	319.73	320	0
42	119-42	26.2636	127.463	20:14:56	2013-05-27	0.005565	355.09	360	0.7
43	119-43	26.2636	127.463	20:15:26	2013-05-27	0.001307	308.7	310	0.2
44	119-44	26.2636	127.463	20:15:56	2013-05-27	0.00314	221.31	230	0.4
45	119-45	26.2636	127.463	20:16:26	2013-05-27	0.000878	212.22	220	0.1
46	119-46	26.2636	127.463	20:16:56	2013-05-27	0.000429	130.51	140	0.1
47	119-47	26.2636	127.463	20:17:26	2013-05-27		0		0
48	119-48	26.2636	127.463	20:17:56	2013-05-27	0.002019	283.3	290	0.2
49	119-49	26.2636	127.463	20:18:26	2013-05-27	0.000747	231.57	240	0.1
50	119-50	26.2636	127.463	20:18:56	2013-05-27	0.001326	25.39	30	0.2
51	119-51	26.2636	127.463	20:19:26	2013-05-27	0.001145	309.26	310	0.1
52	119-52	26.2636	127.463	20:19:56	2013-05-27	0.001881	289.61	290	0.2
53	119-53	26.2636	127.463	20:20:26	2013-05-27	0.00112	281.97	290	0.1
54	119-54	26.2636	127.463	20:20:56	2013-05-27	0.000376	235.37	240	0
55	119-55	26.2636	127.463	20:21:26	2013-05-27	0.001205	240.95	250	0.1
56	119-56	26.2636	127.463	20:21:56	2013-05-27	0.001554	252.25	260	0.2
57	119-57	26.2636	127.463	20:22:26	2013-05-27	0.005635	255.3	260	0.7
58	119-58	26.2636	127.463	20:22:56	2013-05-27	0.000381	247.06	250	0
59	119-59	26.2636	127.463	20:23:26	2013-05-27	0.001191	183.62	190	0.1
60	119-60	26.2636	127.463	20:23:56	2013-05-27	0.000118	293.13	300	0
61	119-61	26.2636	127.463	20:24:26	2013-05-27	0.001284	214.49	220	0.2
62	119-62	26.2636	127.463	20:24:56	2013-05-27	0.000212	213.56	220	0
63	119-63	26.2636	127.463	20:25:26	2013-05-27	0.000204	24.23	30	0
64	119-64	26.2636	127.463	20:25:56	2013-05-27	0.000901	110.5	120	0.1
65	119-65	26.2636	127.463	20:26:26	2013-05-27	0.002592	105.37	110	0.3
66	119-66	26.2636	127.463	20:26:56	2013-05-27	0.000383	78.83	80	0
67	119-67	26.2636	127.463	20:27:26	2013-05-27	0.000917	83.6	90	0.1
68	119-68	26.2636	127.463	20:27:56	2013-05-27	0.002685	46.77	50	0.3
69	119-69	26.2636	127.463	20:28:26	2013-05-27	0.000598	71.91	80	0.1
70	119-70	26.2636	127.463	20:28:56	2013-05-27	0.006055	93.43	100	0.7
71	119-71	26.2636	127.463	20:29:26	2013-05-27		0		0
72	119-72	26.2636	127.463	20:29:56	2013-05-27	0.000908	57.88	60	0.1
73	119-73	26.2636	127.463	20:30:26	2013-05-27	0.003745	55.23	60	0.4
74	119-74	26.2636	127.463	20:30:56	2013-05-27	0.001984	134.23	140	0.2
75	119-75	26.2636	127.463	20:31:26	2013-05-27	0.005958	147.49	150	0.7
76	119-76	26.2636	127.463	20:31:56	2013-05-27	0.001546	155.06	160	0.2
77	119-77	26.2636	127.463	20:32:26	2013-05-27	0.001307	163.65	170	0.2
78	119-78	26.2635	127.463	20:32:56	2013-05-27	0.002221	160.2	170	0.3
79	119-79	26.2635	127.463	20:33:26	2013-05-27		0		0
80	119-80	26.2635	127.463	20:33:56	2013-05-27	0.001438	155.62	160	0.2
81	119-81	26.2635	127.463	20:34:26	2013-05-27	0.001726	155.39	160	0.2
82	119-82	26.2635	127.463	20:34:56	2013-05-27		0		0
83	119-83	26.2635	127.463	20:35:26	2013-05-27	0.00255	147.26	150	0.3
84	119-84	26.2635	127.463	20:35:56	2013-05-27	0.00382	162.82	170	0.5
85	119-85	26.2635	127.463	20:36:26	2013-05-27	0.002603	147.35	150	0.3
86	119-86	26.2635	127.463	20:36:56	2013-05-27	0.001322	34.7	40	0.2
87	119-87	26.2635	127.463	20:37:26	2013-05-27	0.001609	118.62	120	0.2
88	119-88	26.2635	127.463	20:37:56	2013-05-27	0.004308	120.29	130	0.5
89	119-89	26.2635	127.463	20:38:26	2013-05-27	0.001933	131.17	140	0.2
90	119-90	26.2635	127.463	20:38:56	2013-05-27	0.001325	309.64	310	0.2
91	119-91	26.2635	127.463	20:39:26	2013-05-27	0.002624	147	150	0.3
92	119-92	26.2635	127.463	20:39:56	2013-05-27	0.006012	139.61	140	0.7
93	119-93	26.2635	127.463	20:40:26	2013-05-27	0.002882	213.44	220	0.3
94	119-94	26.2635	127.463	20:40:56	2013-05-27	0.000456	213.37	220	0.1
95	119-95	26.2635	127.463	20:41:26	2013-05-27	0.006151	308.35	310	0.7
96	119-96	26.2635	127.463	20:41:56	2013-05-27	0.00064	258.29	260	0.1
97	119-97	26.2635	127.463	20:42:26	2013-05-27	0.000352	118.39	120	0
98	119-98	26.2635	127.463	20:42:56	2013-05-27	0.005712	144.06	150	0.7
99	119-99	26.2635	127.463	20:43:26	2013-05-27	0.005547	108.55	110	0.7
100	120-1	26.2634	127.463	20:46:13	2013-05-27		0		0
101	120-2	26.2634	127.463	20:46:43	2013-05-27	0.009348	215.54	220	1.1
102	120-3	26.2634	127.463	20:47:13	2013-05-27	0.006821	34.4	40	0.8
103	120-4	26.2634	127.463	20:47:43	2013-05-27	0.004881	140.92	150	0.6
104	120-5	26.2634	127.463	20:48:13	2013-05-27	0.012021	36.69	40	1.4
105	120-6	26.2634	127.463	20:48:43	2013-05-27	0.003971	89.73	90	0.5
106	120-7	26.2634	127.463	20:49:13	2013-05-27	0.002017	177.62	180	0.2
107	120-8	26.2634	127.463	20:49:43	2013-05-27	0.001027	231.4	240	0.1
108	120-9	26.2634	127.463	20:50:13	2013-05-27	0.002029	105.39	110	0.2
109	120-10	26.2634	127.463	20:50:43	2013-05-27	0.003191	125.18	130	0.4
110	120-11	26.2634	127.463	20:51:13	2013-05-27	0.004277	101.65	110	0.5
111	120-12	26.2634	127.463	20:51:43	2013-05-27	0.00219	128.87	130	0.3
112	120-13	26.2634	127.463	20:52:13	2013-05-27	0.002806	108.12	110	0.3
113	120-14	26.2634	127.463	20:52:43	2013-05-27	0.010584	89.65	90	1.3
114	120-15	26.2634	127.463	20:53:13	2013-05-27	0.005313	62.18	70	0.6
115	120-16	26.2634	127.463	20:53:43	2013-05-27	0.005953	81.39	90	0.7
116	120-17	26.2634	127.463	20:54:13	2013-05-27	0.001989	72.61	80	0.2
117	120-18	26.2634	127.463	20:54:43	2013-05-27	0.006896	45.66	50	0.8
118	120-19	26.2634	127.463	20:55:13	2013-05-27	0.002855	53.93	60	0.3
119	120-20	26.2634	127.463	20:55:43	2013-05-27	0.008386	49.79	50	1
120	120-21	26.2635	127.463	20:56:13	2013-05-27	0.003515	56.85	60	0.4
121	120-22	26.2635	127.463	20:56:43	2013-05-27	0.000461	43.54	50	0.1
122	120-23	26.2635	127.463	20:57:13	2013-05-27	0.007507	32.99	40	0.9
123	120-24	26.2635	127.463	20:57:43	2013-05-27	0.000431	63.11	70	0.1
124	120-25	26.2635	127.463	20:58:13	2013-05-27	0.006326	17.69	20	0.8
125	120-26	26.2635	127.463	20:58:43	2013-05-27	0.002706	17.44	20	0.3
126	120-27	26.2635	127.463	20:59:13	2013-05-27	0.00149	27.75	30	0.2
127	120-28	26.2635	127.463	20:59:43	2013-05-27	0.001475	26.6	30	0.2
128	120-29	26.2635	127.463	21:00:13	2013-05-27	0.005749	0.92	10	0.7
129	120-30	26.2635	127.463	21:00:43	2013-05-27	0.002914	48.24	50	0.3
130	120-31	26.2635	127.463	21:01:13	2013-05-27	0.000401	22.05	30	0
131	120-32	26.2635	127.463	21:01:43	2013-05-27		0		0
132	120-33	26.2635	127.463	21:02:13	2013-05-27	0.003996	49.05	50	0.5
133	120-34	26.2635	127.463	21:02:43	2013-05-27	0.00115	76.93	80	0.1
134	120-35	26.2636	127.463	21:03:13	2013-05-27	0.001254	29.99	30	0.2
135	120-36	26.2636	127.463	21:03:43	2013-05-27	0.003998	84.4	90	0.5
136	120-37	26.2636	127.463	21:04:13	2013-05-27	0.010043	91.27	100	1.2
137	120-38	26.2636	127.463	21:04:43	2013-05-27	0.000888	64.62	70	0.1
138	120-39	26.2635	127.463	21:05:13	2013-05-27	0.005006	111.55	120	0.6
139	120-40	26.2635	127.463	21:05:43	2013-05-27	0.001053	52.53	60	0.1
140	120-41	26.2635	127.463	21:06:13	2013-05-27	0.009884	104.81	110	1.2
141	120-42	26.2635	127.463	21:06:43	2013-05-27	0.003496	78.66	80	0.4
142	120-43	26.2636	127.463	21:07:13	2013-05-27	0.005597	22.95	30	0.7
143	120-44	26.2635	127.463	21:07:43	2013-05-27	0.014967	146.12	150	1.8
144	120-45	26.2635	127.463	21:08:13	2013-05-27	0.009455	32.04	40	1.1

## Sheet: Sheet5
No	Log	Lat	Long	Time	Day	Dis	Ang	Speed
1	start	26.2634	127.462	20:08:00	2013-05-22
2	start	26.2634	127.462	20:08:00	2013-05-22
1	start	26.2635	127.462	20:08:00	2013-05-22
2	middle	26.2637	127.463	20:13:00	2013-05-22
3	111-1	26.2633	127.464	20:42:40	2013-05-22	0	0	0
4	111-2	26.2633	127.464	20:43:10	2013-05-22	0.027676	133	3.3
5	111-3	26.2633	127.464	20:43:40	2013-05-22	0.002219	307	0.3
6	111-4	26.2633	127.464	20:44:10	2013-05-22	0.004263	286	0.5
7	111-5	26.2633	127.464	20:44:40	2013-05-22	0.003807	282	0.5
8	111-6	26.2633	127.464	20:45:10	2013-05-22	0.001392	50	0.2
9	111-7	26.2633	127.464	20:45:40	2013-05-22	0.001008	198	0.1
10	111-8	26.2633	127.464	20:46:10	2013-05-22	0.001804	351.2	0.2
11	111-9	26.2633	127.464	20:46:40	2013-05-22	0.003562	271.05	0.4
12	111-10	26.2633	127.464	20:47:10	2013-05-22	0.001593	80.61	0.2
13	111-11	26.2633	127.464	20:47:40	2013-05-22	0.002431	104.15	0.3
14	111-12	26.2633	127.464	20:48:10	2013-05-22	0.005709	73.27	0.7
15	111-13	26.2633	127.464	20:48:40	2013-05-22	0.000914	310.58	0.1
16	111-14	26.2633	127.464	20:49:10	2013-05-22	0.002434	268.47	0.3
17	111-15	26.2633	127.464	20:49:40	2013-05-22	0.001274	311.56	0.2
18	111-16	26.2633	127.464	20:50:10	2013-05-22	0.003065	205.87	0.4
19	111-17	26.2633	127.464	20:50:40	2013-05-22	0.007329	96.55	0.9
20	111-18	26.2633	127.464	20:51:10	2013-05-22	0.015033	154.82	1.8
21	111-19	26.2633	127.464	20:51:40	2013-05-22	0.018422	295.85	2.2
22	111-20	26.2633	127.464	20:52:10	2013-05-22	0.01236	55.33	1.5
23	111-21	26.2633	127.464	20:52:40	2013-05-22	0.016704	259.1	2
24	111-22	26.2633	127.464	20:53:10	2013-05-22	0.000441	312.35	0.1
25	111-23	26.2633	127.464	20:53:40	2013-05-22	0.004372	303.52	0.5
26	111-24	26.2633	127.464	20:54:10	2013-05-22	0.005329	315.6	0.6
27	111-25	26.2633	127.463	20:54:40	2013-05-22	0.008802	330.03	1.1
